# Supplementary material for: Retinol-Binding Protein-4 Predicts Visceral Adiposity and Related Inflammatory–Cardiometabolic Profiles in Women
Source: Research Square preprint supplement (doi:10.21203/rs.3.rs-8310783/v1), 2025-12-10
Supplement: Supplementary file 1 [file 424f05928e7fd3fe35fc5cc9.docx]

**Retinol-Binding Protein-4 Predicts Visceral Adiposity and Related Inflammatory–Cardiometabolic Profiles in Women**

**Significance Statement:**

This study provides new mechanistic insight into the metabolic role of retinol-binding protein 4 (RBP4) by identifying it as a key predictor of visceral adiposity and its accompanying inflammatory and atherogenic burden. This is especially relevant in women particularly during menopausal transition, when hormonal shifts increase visceral fat and cardiometabolic vulnerability. Using hormonally controlled cohorts, minimized endocrine variability, a major limitation in women studies, and enabled a clearer characterization of RBP4’s metabolic associations. While RBP4 has traditionally been linked to insulin resistance, our findings demonstrate strong adiposity-related associations with cardiometabolic vulnaribility

Given that RBP4 is the primary transporter of retinol, a regulator of adipocyte differentiation, these observations raise a biologically plausible connection between RBP4 and depot-specific fat expansion. Mediation analyses further showed that RBP4 was associated with atherogenic and oxidative markers *independent* of visceral fat, suggesting an additional adiposity-independent pathway contributing to metabolic risk. Although an anti-inflammatory fat-independent association was observed, it was outweighed by adiposity-linked inflammation, highlighting the predominance of visceral fat in shaping RBP4’s metabolic profile.

Although the findings are associative, this study proposes a novel conceptual framework in which RBP4 may contribute to heightened visceral adiposity–related metabolic vulnerability through both adiposity-linked and adiposity-independent pathways. These results may provide a foundation for future mechanistic and translational studies to determine whether RBP4 influences visceral fat biology and its associated metabolic profiles. They also highlight the potential for developing strategies that target RBP4-related pathways to modulate visceral adiposity and its metabolic consequences across sexes.
